# Supplementary material for: Intracellular Ca2+-Mediated AE2 Is Involved in the Vectorial Movement of HaCaT Keratinocyte
Source: Int J Mol Sci. 2020 Nov 10;21(22):8429. doi: 10.3390/ijms21228429 (PMC7698169; doi:10.3390/ijms21228429)
Supplement: Supplementary file 1 [file ijms-21-08429-s001.pdf]

## *Article*

# **Intracellular $\text{Ca}^{2+}$ -mediated AE2 is involved in the vectorial movement of HaCaT keratinocyte**

**Soyoung Hwang <sup>1</sup>, Dong Min Shin <sup>2,\*</sup> and Jeong Hee Hong <sup>1,3\*</sup>**

1 Department of Physiology, College of Medicine, Gachon University

2 Department of Oral Biology, Yonsei University College of Dentistry, Seoul 03722, Republic of Korea

3 Department of Health Sciences and Technology, GAIHST, Gachon University, 155 Getbeolro, Yeonsu-gu, Incheon 21999, Republic of Korea;

\*Correspondence: [minicleo@gachon.ac.kr](mailto:minicleo@gachon.ac.kr) (JHH); [dmshein@yuhs.ac](mailto:dmshein@yuhs.ac) (DMS); Tel.: +82-32-899-6682 (JHH); Tel.: +82-2-2228-3051 (DMS); Fax: +82-32-899-6039 (JHH), Fax: +82-2-364-1085 (DMS)

## Supplementary Figure S1. Hwang et al.

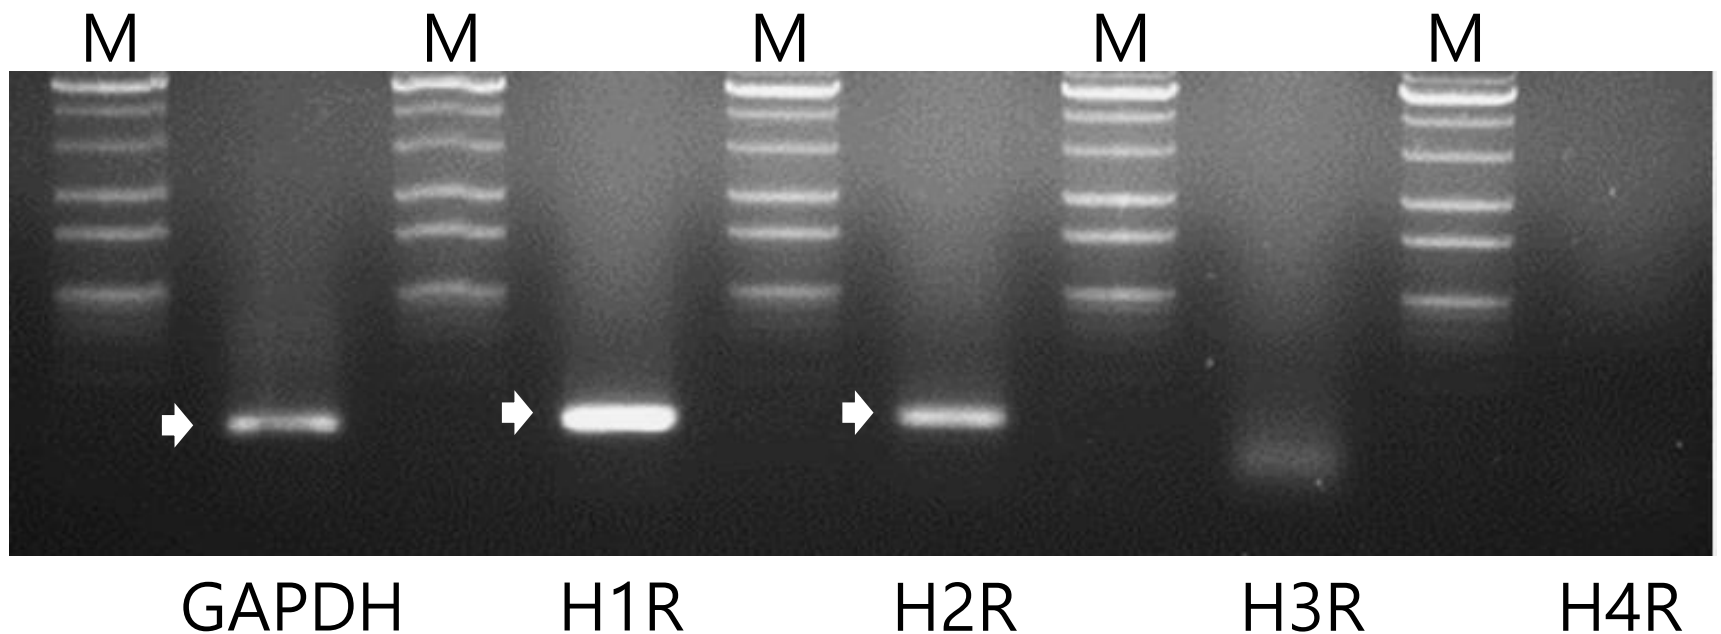

**Supplementary Figure S1. The HaCaT keratinocytes were expressed Histamine family receptors.**

The mRNA expression with Histamine family receptors (H1R, H2R, H3R and H4R, white arrows) in HaCaT cells. M: DNA ladder.
